1 **Computational drug repositioning of bortezomib to reverse metastatic effect of**  
2 ***GALNT14* in lung cancer**

3 Running title: **A data-driven route to drug discovery for undruggable targets**

4 Ok-Seon Kwon<sup>1\*</sup>, Haeseung Lee<sup>2\*</sup>, Hyeon-Joon Kong<sup>3</sup>, Ji Eun Park<sup>1</sup>, Woon Lee<sup>1</sup>,  
5 Seungmin Kang<sup>2</sup>, Mirang Kim<sup>4</sup>, Wankyu Kim<sup>2#</sup>, Hyuk-Jin Cha<sup>1#</sup>

6

7 <sup>1</sup> College of Pharmacy, Seoul National University, Seoul 08826, Republic of Korea <sup>2</sup>  
8 Research Center for Systems Biology, Department of Life Sciences, Ewha Womans  
9 University, Seoul 03760, Republic of Korea <sup>3</sup> College of Natural Sciences, Department  
10 of Life Sciences, Sogang University, Seoul 04107, Republic of Korea <sup>4</sup> Personalized  
11 Genomic Medicine Research Center, Korea Research Institute of Bioscience and  
12 Biotechnology, Daejeon 34141, Republic of Korea

13 \* These authors contributed equally to this work.

14 #Corresponding authors: [hjcha93@snu.ac.kr](mailto:hjcha93@snu.ac.kr) and [wkim@ewha.ac.kr](mailto:wkim@ewha.ac.kr)

15

16 Hyuk-Jin Cha, PhD

17 College of Pharmacy, Department of Pharmacy, Seoul National University

18 1 Gwanak-ro, Gwanak-gu, Seoul 08826, Republic of Korea

19 Tel.: +82-2-880-7825; Fax: +82-2-880-9122; E-mail: [hjcha93@snu.ac.kr](mailto:hjcha93@snu.ac.kr)

20

21 Wan-Kyu Kim, Ph.D

22 Ewha Research Center for Systems Biology, Department of Life Sciences, Ewha  
23 Womans University

24 52, Ewhayeodae-gil, Seodaemun-gu, Seoul 03760 Republic of Korea

1 Tel: +82-2-3277-4132, Fax: +82-2-3277-6809, Email: [wkim@ewha.ac.kr](mailto:wkim@ewha.ac.kr)

2

3 Conflicts of interest: The author declares that he has no conflict of interest.

1 **Abstract**

2 Although many molecular targets for cancer therapy have been discovered, they often  
3 show poor druggability, which is a major obstacle to develop targeted drugs. As an  
4 alternative route to drug discovery, we adopted an *in silico* drug repositioning (*in silico*  
5 DR) approach based on large-scale gene expression signatures, with the goal of  
6 identifying inhibitors of lung cancer metastasis. Our analysis of clinicogenomic data  
7 identified GALNT14, an enzyme involved in O-linked N-acetyl galactosamine  
8 glycosylation, as a putative driver of lung cancer metastasis leading to poor survival. To  
9 overcome the poor druggability of GALNT14, we leveraged Connectivity Map  
10 approach, an *in silico* screening for drugs that are likely to revert the metastatic  
11 expression patterns. It leads to identification of bortezomib (BTZ) as a potent metastatic  
12 inhibitor, bypassing direct inhibition of poorly druggable target, GALNT14. The anti-  
13 metastatic effect of BTZ was verified *in vitro* and *in vivo*. Notably, both BTZ treatment  
14 and *GALNT14* knockdown attenuated TGF $\beta$ -mediated gene expression and suppressed  
15 TGF $\beta$ -dependent metastatic genes, suggesting that BTZ acts by modulating TGF $\beta$   
16 signaling. Taken together, these results demonstrate that our *in silico* DR approach is a  
17 viable strategy to identify a candidate drug for undruggable targets, and to uncover its  
18 underlying mechanisms.

19

20 **Keywords:** GALNT14, connectivity map, drug repositioning, bortezomib, TGF $\beta$ ,  
21 metastasis, undruggable targets

22

## 1 **Introduction**

2           In the context of personalized anti-cancer therapy based on targeting specific  
3 proteins with the goal of lowering cancer-related mortality (1), a great deal of effort has  
4 been devoted to identifying both molecular targets and accompanying drugs (2, 3).  
5 However, the fraction of patients eligible for personalized anti-cancer therapy is very  
6 limited (4) due to the poor druggability of newly identified molecular targets,  
7 notwithstanding recent advances in strategies in drugging ‘undruggable’ proteins (5, 6).

8           An alternative approach to matching candidate drugs to poorly druggable  
9 cancer targets is *in silico* drug repositioning (*in silico* DR) (7, 8). Due to the well-  
10 characterized pharmacology and safety of approved drug libraries(9), this approach has  
11 the potential to reduce cost and attrition during the clinical phases of drug development.  
12 Several approaches to DR have been tested in the context of oncology (10) and a few of  
13 the resultant drugs, including celecoxib and thalidomide, have been approved by the  
14 FDA for repurposing as anti-cancer therapeutics (11). Along with recent advances in  
15 sequencing technologies, chemogenomic databases containing drug-induced gene  
16 expression profiles provide clues regarding potential treatments for personalized cancer  
17 targets, and can also suggest candidate drugs based on tailored gene signatures of  
18 cancers upon identification of molecular targets (12). The Connectivity Map (CMap), a  
19 collection of genome-wide expression profiles of cell lines treated with >20,000  
20 chemicals(13), has been used to identify candidate drugs for certain cancer types (14-  
21 16).

22           N-acetyl-galactosaminyltransferases (GalNAc-Ts or GALNTs) are key  
23 enzymes that initiate O-linked N-acetyl galactosamine (GalNAc) glycosylation. This  
24 process is an important step in the synthesis of Thomsen-nouvelle (Tn) antigens, which

1 are well-characterized tumor-associated molecules (17). In particular, *GALNT14* has  
2 been examined in the context of apoptotic signaling (18, 19); invasion and migration of  
3 breast (20, 21), ovary (22), and lung (23) cancers; and multi-drug resistance of breast  
4 cancer cells (24). Moreover, *GALNT14* expression is not only a prognostic marker in  
5 neuroblastoma (25) and lung cancer (23), but also a predictive marker for  
6 Apo2L/TRAIL-based cancer therapy (18), although a randomized phase II study based  
7 on the predictive marker of GALNT14 for dulanermin did not improve patient outcome  
8 (26).

9         In this study, through transcriptome analysis of the TCGA dataset and *in vitro*  
10 and *in vivo* studies, we demonstrated that *GALNT14* is strongly associated with lung  
11 cancer recurrence due to the high migration and invasion properties of tumor cells.  
12 Rather than attempting direct inhibition of the poorly druggable GALNT14 protein or  
13 downstream signaling, we leveraged large-scale drug-induced transcriptome data to  
14 identify candidate drug(s) likely to reverse *GALNT14*-dependent gene expression, *i.e.*,  
15 drugs that led to transcriptomic changes similar to those induced by *GALNT14* depletion.  
16 We successfully identified an anti-metastatic candidate drug that mimicked *GALNT14*  
17 depletion. The results demonstrate that this approach represents a viable strategy for  
18 discovering candidate drugs for many other undruggable targets.

19

## 1 **Results and discussion**

### 2 ***GALNT14* as a putative molecular target for lung cancer metastasis**

3 Identification of molecular targets in recurrent cancers is essential not only for  
4 predicting prognosis, but also for matching specific drug–target pairs if they are  
5 available. To identify potential molecular targets related to cancer recurrence, we  
6 assembled transcriptome data and clinical information from 516 lung cancer patients  
7 from the TCGA LUAD cohort (Figure. 1A). Concentrating on molecular targets  
8 relevant to recurrent lung cancer, we performed a series of relapse-free survival (RFS)  
9 analyses and differential expression analyses. Expression of seven genes (*GALNT14*,  
10 *COL7A1*, *GPR115*, *C1QTNF6*, *KRT16*, *INHA*, and *TNFSF11*) was significantly  
11 associated with cancer progression, recurrence (Figure. 1B), and overall survival  
12 (Figure. S1A), indicating that these genes are potentially valuable as predictors of poor  
13 prognosis. Notably, metastasis-related genes were significantly overrepresented in gene  
14 lists selected by both RFS ( $P = 2.3 \times 10^{-6}$ ) and differential expression ( $P = 5.2 \times 10^{-19}$ )  
15 analysis, including two genes (*e.g.*, *TNFSF11* and *INHA*) among the seven  
16 aforementioned candidates. To further confirm the relevance of each gene to metastasis  
17 or tumorigenesis, we divided lung cancer patients into two groups (low or high) using  
18 the median expression of each gene as the cutoff. Both metastasis and tumor signatures  
19 were positively enriched in the high-expression groups of all seven genes (Figure. 1C),  
20 and the significant enrichment was observed for *GALNT14* (Figure. 1D).

21 *GALNT14*, which encodes a glycosyltransferase involved in O-glycosylation,  
22 has been implicated in both tumor malignancy (25) and metastasis (20, 21, 23). As  
23 expected, metastatic (Figure. 1E) and tumorigenic potentials (Figure. 1F) were  
24 markedly attenuated by loss of *GALNT14*, indicating that the gene is important for

1 metastasis as well as tumorigenesis. Further, metastatic lung cancer cells were more  
2 vulnerable to *GALNT14* depletion than non-metastatic or other types of cancers in the  
3 *Project Achilles* dataset(27), a genome-scale RNAi screening data from for 501 cancer  
4 cell lines, including 126 cell lines originating from metastatic patients (Figure. 1G).  
5 Other candidate genes were less vulnerable in metastatic lung cancer (Figure. S1B).  
6 Consistent with this, *GALNT14* expression shows a clearly negative correlation with  
7 both locoregional recurrence-free survival (LRFS) and distant metastasis-free survival  
8 (DMFS) (Figure. 1H) as well as overall survival (Figure. S1A) in the TCGA LUAD  
9 cohorts. In addition, normal lung expresses only a low level of *GALNT14*, and there is a  
10 large gap between normal and lung cancer tissue (Figure. S1C)(28). All these results  
11 suggested *GALNT14* as a promising molecular target for lung cancer metastasis to  
12 improve patient survival.

13

#### 14 **Computational repositioning of BTZ to reverse the *GALNT14* expression signature**

15 Although *GALNT14* may be a potential therapeutic target for metastatic lung cancer,  
16 GALNTs remain poorly druggable despite several attempts to find specific inhibitors  
17 (29, 30). Notably in this regard, GALNT14-dependent metastatic potential is governed  
18 by induction of transcription factors (e.g. *HOXB9* or *SOX4*) rather than by altered  
19 glycosylation (20, 23). Therefore, rather than inhibiting GALNT14 directly, we  
20 leveraged CMap dataset to virtually screen drugs that mimic the effects of *GALNT14*  
21 depletion at the transcriptome level. In particular, we focused on genes associated with  
22 metastasis or *GALNT14* expression, and considered that these genes should be  
23 suppressed in order to restore the metastatic to the normal. To this end, we defined two  
24 distinct *GALNT14* signatures. We collected a comprehensive list of 3711 metastasis-

1 related genes and selected two sets of genes among them: (i) 20 genes up-regulated in  
2 the *GALNT14*-high group in the TCGA LUAD cohort, and (ii) 49 genes down-regulated  
3 by *GALNT14* knockdown in the H460 cell line. Accordingly, our subsequent predictions  
4 using *GALNT14* signatures would prioritize drugs that are probably relevant to both  
5 *GALNT14*-dependence and metastasis.

6 Using the two *GALNT14* signatures, we performed two independent predictions by  
7 CMap analyses (Figure. 2A). Candidate drugs were prioritized according to their DR  
8 scores (See Materials and Methods in detail). Two drugs, dexamethasone (DEX, an anti-  
9 inflammatory corticosteroid) and bortezomib (BTZ, a first-in-class proteasome inhibitor  
10 used to treat multiple myeloma), were among the top candidates in both predictions  
11 (Figure. 2B). We then validated expression levels of *SOX4*, *AREG*, and *VCAN*, which  
12 are strongly associated with metastasis and regulated by *GALNT14* (20, 23) (Figures.  
13 S2B and S2C). Among genes differentially expressed in response to either DEX or BTZ  
14 in the CMap dataset, *SOX4* (but not *AREG* or *VCAN*) was commonly altered, indicating  
15 that *SOX4* could serve as a validation marker (Figure. S2C). As predicted, we observed  
16 dose-dependent suppression of *SOX4* (but not *VCAN*) in H460 cells treated with either  
17 DEX or BTZ. Although BTZ suppressed *SOX4* less effectively than DEX (EC<sub>50</sub>: 15 nM  
18 vs. 5 nM, respectively) (Figure. S2D), BTZ treatment led to a significant reduction in  
19 the migration capacity of H460 cells, whereas DEX did not (Figure. 2C). The EC<sub>50</sub> for  
20 proteasome inhibition was around 20 nM (Figure. 2D and S2E), a concentration at  
21 which BTZ clearly inhibited migration (Figures. 2E and S2F) and invasion (Figure. 2F)  
22 by lung cancer cells, while it did not affect *GALNT14* expression (Figure. S2G), cell  
23 viability (Figures. 2G and S2H) nor the cell proliferation (Figures. 2H and S2I). Of note,  
24 A549 with relatively lower *GALNT14* expression than H1299 and H460 (Figure. S2J)



1 did not respond to BTZ treatment in migration (Figure. S2K) and invasion (Figure.  
2 S2L), while proteasome inhibition by BTZ occurred (Figure. S2M), suggesting that  
3 anti-invasion/migration effect of BTZ would be associated with GALNT14 expression.  
4

### 5 **The effect of BTZ is independent of proteasome inhibition**

6       Given that the anti-migration/invasion effect of BTZ occurred at a  
7 concentration that also inhibited proteasome activity (Figures. 2D and E), we sought to  
8 determine whether this effect was a result of proteasome inhibition *per se*. To  
9 investigate this issue, we first compared the chemical structure of three FDA-approved  
10 proteasome inhibitors, BTZ, carfilzomib (CFZ), and ixazomib (IXZ), all of which are  
11 approved for treatment of multiple myeloma (31). CFZ displayed similar profiles with  
12 regards to Tanimoto coefficients or Jaccard index of molecular fingerprints(32)  
13 (Figure. 3A). In contrast to BTZ, CFZ also inhibited proteasome activity (Figure. S3A)  
14 and stabilized well-characterized proteasome targets  $\beta$ -catenin, Cyclin D1, and p27  
15 (Figure. 3B), but failed to suppress migration (Figure. 3C) and invasion (Figure. 3D) at  
16 the same concentration. Moreover, the boronic acid moiety responsible for the  
17 proteasome inhibition (33) was present in both BTZ and IXZ. However, like CFZ,  
18 treatment with IXZ could not inhibit migration (Figure. S3B). These data suggest that  
19 BTZ has an off-target effect that is independent of proteasome inhibition.

20       To confirm that the anti-migration/invasion effect of BTZ is not dependent on  
21 proteasome inhibition, we compared transcriptome profiles of H460 cells treated with  
22 BTZ, CFZ and depleted of *GALNT14* (sh*GAL*). Perturbation by BTZ and sh*GAL* (but  
23 not CFZ) induced similar transcriptomic changes relative to the control (Figure. 3E, left  
24 panel). Moreover, the expression patterns of metastatic signature genes were even more

1 similar between BTZ and shGAL, whereas CFZ had a minimal effect on only a few  
2 genes (Figure. 3E, middle panel). By contrast, expression of proteasome-related genes  
3 was altered significantly by both drugs, but only marginally by shGAL (Figure. 3E, right  
4 panel). Genes down-regulated by BTZ and shGAL overlapped significantly (101  
5 common genes;  $P = 5.3 \times 10^{-54}$ ), suggesting that BTZ treatment partially mimics  
6 depletion of *GALNT14* (Figure. 3F). These results are consistent with the phenotypic  
7 outcomes, i.e., BTZ, but not CFZ, suppressed cell migration and invasion similarly to  
8 *GALNT14* depletion.

9

#### 10 **Attenuation of the TGF $\beta$ gene response by BTZ treatment or *GALNT14*** 11 **knockdown**

12 We hypothesized that a subset of the 101 genes down-regulated by both BTZ  
13 treatment and *GALNT14* depletion could account for anti-migration/invasion effects of  
14 BTZ. To investigate the drug's mode of action, we conducted pathway enrichment  
15 analysis of the 101 genes and investigated the clinical significance of each pathway  
16 (Figure. 4A). Among the most enriched pathways was TGF $\beta$  signaling (hazard ratio  
17 [HR] = 1.2). BTZ treatment induced changes in expression of individual TGF $\beta$   
18 signaling genes that were very similar to those induced by shGAL (Figure. S4A for BTZ  
19 and Figure. S4B for shGAL). *Moreover, genes commonly down-regulated (e.g., INHBA,*  
20 *FST, and BMPR) among targets of TGF $\beta$  signaling were indeed suppressed (Figure.*  
21 *4B). Suppression of the TGF $\beta$ -dependent gene signature, a common effect of BTZ*  
22 *treatment and *GALNT14* depletion, was validated by reporter assays using the Smad-*  
23 *binding element (SBE), activin-response element (ARE), and BMP-response element*

1 (BRE) (Figure. 4C). Similarly, TGF $\beta$  reporter activity decreased after treatment with  
2 BTZ, but not CFZ (Figure. 4D), while  $\beta$ -catenin and Cyclin D1 were stabilized by  
3 proteasome inhibition following treatment with either BTZ or CFZ (Figure. S4C).  
4 Receptors activation by TGF $\beta$  transduce signal through direct phosphorylation of R-  
5 SMAD, including SMAD2 or SMAD3, which leads to interaction to co-SMAD (i.e.  
6 SMAD4) for nuclear translocation (34). Concomitant with the reduction in SMAD2  
7 phosphorylation with (Figure. 4E) or without TGF $\beta$  stimulation (Figure. S4C), SMAD4  
8 nuclear translocation was inhibited significantly by BTZ treatment (Figure. 4F).  
9 Consistently, TGF $\beta$  dependent gene responses (determined by SBE or BRE) upon  
10 TGF $\beta$  stimulation, were significantly attenuated by BTZ treatment (Figure. S4D). As  
11 depletion of SMAD4 was sufficient to inhibit both migration and invasion (Figures. 4G  
12 and H), inhibition of SMAD2 phosphorylation (Figures. 4E and S4C) and subsequent  
13 delay of SMAD4 nuclear translocation (Figure. 4F) by BTZ would be a possible mode  
14 of action of BTZ. It is important to note that the TGF $\beta$  signaling pathway has been  
15 studied extensively as a tumor suppressor, a tumor promoter (35), and a promoter of  
16 metastasis (36). To determine whether the TGF $\beta$  signaling response is associated with  
17 *GALNT14*, we selected a set of TGF $\beta$  downstream targets (37) and examined their  
18 correlations with *GALNT14* expression and patient prognosis (Figure. 4I). Notably,  
19 SMAD4-dependent targets *PCDH7* and *LAMC2*, previously shown to induce metastasis  
20 (38, 39) or tumorigenicity (40, 41), were highly correlated with *GALNT14* (Figure. 4I).  
21 Moreover, the SMAD4-dependent TGF $\beta$  targets was associated to RFS in the  
22 *GALNT14*-high group ( $P = 0.045$ , Figure. 4J), suggesting that some SMAD4-dependent  
23 targets responsible for cancer recurrence are strongly associated with *GALNT14*

1 expression. These results imply that BTZ treatment, like *GALNT14* depletion, exerts its  
2 anti-metastatic effect by interfering with nuclear translocation of SMAD4 (Figure. 4F)  
3 and with the SMAD4-dependent gene expression response (Figure. 4D). Finally, we  
4 defined a set of genes commonly down-regulated by both BTZ and sh*GAL* among the  
5 SMAD4 dependent targets as ‘*GALNT14*–TGF $\beta$  signature’ (See Materials and Methods).  
6 The average activity of the *GALNT14*–TGF $\beta$  signature strongly discriminated patient  
7 RFS ( $P = 4.0 \times 10^{-4}$ , Figure. 4K), and *GALNT14* expression was significantly higher in  
8 lung cancer patients with higher levels of the signature ( $P = 0.025$ , Figure. 4L). Overall,  
9 these results suggest that suppressing TGF $\beta$  signaling and gene expression responses  
10 relevant to BTZ (similar to the response observed after *GALNT14* depletion) makes a  
11 major contribution to reducing migration and invasion.

12

### 13 ***In vivo* validation of ant-metastatic effect of BTZ**

14 Given the anti-migration/invasion effect of BTZ in a lung cancer cell model (Figure. 2),  
15 we next tested the *in vivo* efficacy of BTZ against cancer metastasis *in vivo*. For this  
16 purpose, local metastasis was induced in mice by tail vein injection of H460 lung cancer  
17 cells, followed by treatment with or without BTZ or CFZ twice weekly for three weeks  
18 (Figure. 5A). The proteasome-inhibitory effect of BTZ (0.1mg/kg) with CFZ (0.5 mg/kg)  
19 was examined by measuring proteasome activity in blood (Figure. 5B). Under this  
20 concentration, the mice tolerated both BTZ and CFZ, exhibiting neither significant loss  
21 of body weight nor any other abnormalities (Figure. 5C). Consistent with the *in vitro*  
22 assay, the number of metastatic nodules in the lungs of BTZ-treated mice was  
23 significantly lower than that in CFZ- or vehicle-treated animals (Figure. 5D, S5A and  
24 S5B). Close examination of cancer tissue also revealed that inflammatory lesions, which

1 provide favorable microenvironments for tumor formation (42), were present in both  
2 CFZ- and vehicle-treated mice (Figure. S5C). These results were validated with further  
3 experiment to support the efficacy of BTZ on metastasis inhibition. BTZ treatment  
4 considerably attenuated lung colonization (Figure. 5E and S5D) in the presence of a  
5 proteasome inhibitory effect of BTZ (Figure. 5F) but no physiological abnormality  
6 (Figure. S5E). Taken together, the *in vivo* and *in vitro* data reveal that BTZ has a  
7 significant therapeutic advantage over CFZ in that it inhibits cancer metastasis without  
8 significant undesirable side effects.

9 Although many molecular targets for tumorigenesis and metastasis have been  
10 identified, most remain undruggable. For example, the GALNTs, expression of which is  
11 strongly associated with various properties of cancer (20-25), have yet to be drugged,  
12 although a few attempts have been made to develop inhibitors of GALNT-dependent O-  
13 linked glycosylation (29, 30). Thereby, instead of searching direct inhibitors of  
14 GALNT14, we adopted an *in silico* DR approach to reverse the *GALNT14*-dependent  
15 metastatic expression signature with the goal of finding a candidate drug that could  
16 interfere with the *GALNT14*-dependent cancer phenotype. Notably, *HOXB9* and *SOX4*,  
17 transcription factor genes regulated by *GALNT14*, are responsible for metastasis (23)  
18 and self-renewal (20), respectively, suggesting that downstream transcriptional  
19 modulation would be a promising strategy.

20 Unlike similar studies in the past that used the CMap method to analyze differences  
21 in gene expression signatures between normal and cancerous tissue (14, 43), we focused  
22 exclusively on genes (e.g., *GALNT14*) related to the pertinent phenotype (*i.e.*, the  
23 metastatic gene signature) (Figure. 1) and identified BTZ as a drug candidate with novel  
24 anti-metastatic effects both *in vitro* (Figure. 2C–2H) and *in vivo* (Figure. 5). Importantly,

1 we also demonstrated that the anti-metastatic effect of BTZ, in contrast to that of CFZ,  
2 was independent of proteasome inhibition (Figure. 3). Moreover, the metastatic gene  
3 signature of CFZ was also distinct from that of BTZ, whereas the proteasome gene  
4 signatures of the two drugs were relatively similar (Figure. 3). Recent studies examined  
5 the inhibitory effect of BTZ on TGF $\beta$ -dependent responses such as fibrosis (44) and  
6 survival of lymphoma (45), and the results support our conclusions. We also identified  
7 the *GALNT14*-TGF $\beta$  signature that serves as clear indicators of poor prognosis (Figure.  
8 4). Thus, attenuation of TGF $\beta$  signaling by BTZ, depletion of *GALNT14*, or inhibition  
9 of TGF $\beta$  signaling all decrease invasive properties *in vitro* (Figure. 4) and lung  
10 metastasis *in vivo* (Figure. 5), suggesting the drug's mode of action. Accordingly, the  
11 *GALNT14*-TGF $\beta$  signature represents potentially useful prognostic marker for lung  
12 cancer patients, and could be used alongside previously reported marker [*e.g.*, the  
13 TGF $\beta$ -response signature (TBRS) (46) and the MAPK pathway activity score (MPAS)  
14 (47)]. Of note, although BTZ had no undesirable side effects in our *in vivo* experiments,  
15 the risk of peripheral neuropathy in patients treated with BTZ (48) merits a further  
16 search for other candidate drugs with safer profiles that could also reverse the gene  
17 signature associated with *GALNT14* or *GALNT14*-TGF $\beta$  activity. The continued search  
18 for improved candidates could be performed using recently reported *in silico* (or  
19 computational) DR tools (8, 49, 50). Notably in this regard, a recent *in silico* approach  
20 can predict candidate drugs capable of modulating the activities of oncogenic  
21 transcription factors, a class of proteins that has yet to be drugged (7). In the future, it  
22 would be interesting to apply this type of approach to modulate *GALNT14*-regulated  
23 transcription factor genes such as *HOXB9* and *SOX4*, which mediate metastasis (23) and

1 self-renewal (20), respectively. Besides predicting potential candidate drugs, our *in*  
2 *silico* DR approach enabled identification of several marker genes that turned out to be  
3 strongly associated with clinical outcomes such as RFS. This strategy, which integrated  
4 multiple independent expression signatures from cancer patients, genetic perturbation  
5 (*e.g.*, knockdown or overexpression), and drug treatment (CMap), would be applicable  
6 generally to any other types of target. Thus, our results provide a strong “proof-of-  
7 concept” that our DR method is a viable strategy for accessing undruggable molecular  
8 targets, leading to identification of candidate drugs that target specific cellular processes  
9 such as cancer metastasis.

10

11

## 1 **Methods**

### 2 **Cell line establishment and Cell culture**

3 H460, A549 and H1299 cell line which was purchased from Korean cell line bank  
4 (KCLB) were maintained in Dulbecco's modified Eagle's medium (DMEM),  
5 supplemented with 10% fetal bovine serum (FBS), gentamicin (50 µg/ml) at 37°C in a  
6 humidified atmosphere of 5% CO<sub>2</sub> in the air. *GALNT14* knockdown cell lines with  
7 shRNA were established as previously described (23).

### 8 **Reagents and antibodies**

9 The primary antibodies against cleavage caspase-3 (#9664), cleavage caspase-9 (#9505)  
10 and pSmad2 (#310S) were obtained from Cell Signaling Technology. Antibodies against  
11 β-Actin (sc-47778), PARP (sc-7150), p53 (sc-126), p27 (sc-528), p21 (sc-397),  
12 CyclinD1 (sc-718) and CyclinB1 (sc-245) were obtained from Santa Cruz  
13 Biotechnology Inc. and β-catenin (BD 610153) was purchased from BD Biosciences  
14 pharmigen. Bortezomib (S1013) and Carfilzomib (S2853) were purchased from  
15 selleckchem.

### 16 **RNA-sequencing and analysis**

17 H460 cells treated with BTZ, CFZ, depleted of *GALNT14* (sh*GAL*) and their control  
18 (DMSO, shCont) were prepared for RNA sequencing. Total RNA was isolated using the  
19 Trizol according to the manufacture instruction. For library construction, we used the  
20 TruSeq Stranded mRNA Library Prep Kit (Illumina, San Diego, CA). Briefly, the steps  
21 of strand-specific protocol are: first strand cDNA synthesis; second strand synthesized  
22 using dUTPs instead of dTTPs; end repair, A-tailing, and adaptor ligation; PCR  
23 amplification. Then, each library was diluted to 8 pM for 76 cycles of paired-read  
24 sequencing (2 X 75bp) on the Illumina NextSeq 500 per the manufacturer's



1 recommended protocol. Read sequences were aligned to the reference genome (UCSC  
2 hg19) and the mapped counts per gene were quantified by STAR (51). The raw counts  
3 were normalized to CPM (counts per million) based on the trimmed mean of M-values  
4 (TMM) normalization method using R package ‘edgeR’. Differential expression  
5 analyses between samples (shCont vs shGAL, DMSO vs BTZ, or DMSO vs CFZ) were  
6 performed through DESeq2 (52).

### 7 **TCGA data processing and analysis**

8 TCGA lung adenocarcinoma (LUAD) cohort (n=576), containing mRNA gene  
9 expression and clinical data on 388 primary lung cancers, 128 lung cancers with  
10 recurrence, and 59 benign lung tissues were collected from the Broad GDAC Firehose  
11 (<https://gdac.broadinstitute.org/>). Total 494 patients with clinical information tracked for  
12 at least one month were used for survival analysis. For 20,531 genes, all patients were  
13 divided into high and low groups by the median expression of each gene and relapse-  
14 free survival analysis was performed according to the group difference. Hazard ratio  
15 and *P* value were calculated by Cox proportional hazards regression model and log-rank  
16 test respectively. With 58 patients who have gene expression profiles of normal benign  
17 tissues, differential expression in LUAD compared to matched normal samples were  
18 measured from the likelihood ratio test. RNA-seq profiles were normalized and  
19 processed using R package ‘limma’ and ‘DESeq2’, and survival analysis was conducted  
20 by R package ‘survival’.

### 21 **Metastasis and Tumorigenesis signatures**

22 From MSigDB manually curated gene sets (C2), we collected the 35 metastasis- and  
23 44 tumor-related gene sets that are annotated by ‘metastasis’ / ‘epithelial-mesenchymal  
24 transition’ and ‘cancer’/ ‘tumorigenesis’, respectively. We took only Up-regulated genes

1 when both UP- or DOWN-regulated sets were available. Then, we selected 32 and 23  
2 genes as the metastatic and the tumorigenesis signature, respectively, by taking the  
3 consensus genes common to at least three or more gene sets.

#### 4 **CMap analysis to predict candidate drugs**

5 The updated CMap dataset, or LINCS L1000, provides an extensive catalog of  
6 transcriptome profiles for 71 human cell lines treated by 20,413 small molecules. We  
7 obtained the expression dataset (level 5, replicate-collapsed z-score) from Gene  
8 Expression Omnibus (GSE92742), each of which represents normalized genome-wide  
9 differential expression profiles under a unique experimental condition (cell line, drug,  
10 treated dose/time, batch). We used only the 60,321 profiles of high-quality  
11 ( $\text{distil\_cc\_q75} \geq 0.2$ ,  $\text{pct\_self\_rank\_q25} \leq 0.05$ , and  $\text{distil\_nsample} \geq 3$ ) among the  
12 total 205,034 profiles. Unlike the original CMap based on microarray, a single drug may  
13 have multiple expression profiles depending on cell line, dose, time, and sample batch.  
14 Therefore, instead of using the original rank-based Kolmogorov-Smirnov (KS) test, we  
15 made a modified analytic scheme to handle such redundancy. For prediction of drugs  
16 mimicking the down-regulation of *GALNT14*-associated metastatic genes (i.e.  
17 *GALNT14* signature), we calculated Jaccard index between the *GALNT14* signature and  
18 the 100 most down-regulated genes of CMap profiles as similarity score (S). Then, the  
19 similarity scores of a drug were merged into a single DR score (drug repositioning  
20 score), which was calculated as the negative logarithm of the hypergeometric P-value  
21 for over-representation of its similarity scores within the top 10% of the total similarity  
22 scores.

#### 23 **GALNT14-TGF $\beta$ signature**

1 TGF $\beta$  downstream target genes (39 SMAD4 dependent genes and 65 SMAD4  
2 independent genes) were collected from the literature (37). Among the SMAD4  
3 dependent targets, a set of genes commonly down-regulated by both BTZ and shGAL  
4 (*ATF3*, *ARNTL*, *COPA*, *NEDD9*, *LAMC2*, *RAB27B*, and *PCDH7*) was defined as  
5 ‘GALNT14–TGF $\beta$  signature’. To measure the average activity of the signature, KS  
6 statistic was used to estimate the degree of up- or down-regulation of the seven genes in  
7 a sample’s gene expression profile. In TCGA LUAD cohort, the patients with activity in  
8 the top 10% (n=50) or lower 10% (n=50) were classified as ‘high’ or ‘low’ respectively.

### 9 **Statistical analysis**

10 The graphical data were presented as mean  $\pm$  S.E.M. Statistical significance among the  
11 three groups and between groups was determined using one-way or two-way analysis of  
12 variance (ANOVA) following Turkey post-test and Student’s t-test respectively.  
13 Significance was assumed for  $p < 0.05$  (\*),  $p < 0.01$  (\*\*),  $p < 0.001$  (\*\*\*)

14

### 15 **SUPPLEMENTARY DATA**

16 Supplementary information is available from the Wiley Online Library or from the  
17 author.

18

### 19 **AUTHORS’ CONTRIBUTIONS**

20 HJ.C and W.K conceived the overall study design and led the experiments. OS.K and  
21 H.L mainly conducted the experiments, data analysis, and critical discussion of the  
22 results. HJ.K, JE.P, and W.L conducted the mouse xenograft experiments. S.K, JH.K  
23 and M.K generated and analyzed RNAseq data. All authors contributed to manuscript

1 writing and revising, and endorsed the final manuscript.

## 2 **ACKNOWLEDGEMENT**

3 We appreciate Jeong-Hwan Kim, Seon-Young Kim and Dong-Uk Kim at Korea  
4 Research Institute of Bioscience and Biotechnology (KRIBB) for helpful discussions.

5

## 6 **FUNDING**

7 This work was supported by a grant from the National Research Foundation of Korea (  
8 NRF-2017M3C9A5028691 from H.J.C and NRF-2017M3A9B3061843 from W.K).

9

## 10 **DISCLOSURE DECLARATION**

11 The authors declare that they have no conflict of interest.

12

13

14

## 1   **References**

- 2   1.   Spear BB, Heath-Chiozzi M, and Huff J. Clinical application of  
3       pharmacogenetics. *Trends Mol Med.* 2001;7(5):201-4.
- 4   2.   Olsen D, and Jorgensen JT. Companion diagnostics for targeted cancer drugs -  
5       clinical and regulatory aspects. *Front Oncol.* 2014;4:105.
- 6   3.   Kim ES, Herbst RS, Wistuba, II, Lee JJ, Blumenschein GR, Jr., Tsao A, et al.  
7       The BATTLE trial: personalizing therapy for lung cancer. *Cancer Discov.*  
8       2011;1(1):44-53.
- 9   4.   Marquart J, Chen EY, and Prasad V. Estimation of The Percentage of US  
10       Patients With Cancer Who Benefit From Genome-Driven Oncology. *JAMA*  
11       *Oncol.* 2018.
- 12  5.   Lazo JS, and Sharlow ER. Drugging Undruggable Molecular Cancer Targets.  
13       *Annu Rev Pharmacol Toxicol.* 2016;56:23-40.
- 14  6.   Dang CV, Reddy EP, Shokat KM, and Soucek L. Drugging the 'undruggable'  
15       cancer targets. *Nat Rev Cancer.* 2017;17(8):502-8.
- 16  7.   Gayvert KM, Dardenne E, Cheung C, Boland MR, Lorberbaum T, Wanjala J, et  
17       al. A Computational Drug Repositioning Approach for Targeting Oncogenic  
18       Transcription Factors. *Cell Rep.* 2016;15(11):2348-56.
- 19  8.   Nagaraj AB, Wang QQ, Joseph P, Zheng C, Chen Y, Kovalenko O, et al. Using a  
20       novel computational drug-repositioning approach (DrugPredict) to rapidly  
21       identify potent drug candidates for cancer treatment. *Oncogene.* 2018;37(3):403-  
22       14.
- 23  9.   Ashburn TT, and Thor KB. Drug repositioning: identifying and developing new  
24       uses for existing drugs. *Nat Rev Drug Discov.* 2004;3(8):673-83.
- 25  10.   Bertolini F, Sukhatme VP, and Bouche G. Drug repurposing in oncology--patient  
26       and health systems opportunities. *Nat Rev Clin Oncol.* 2015;12(12):732-42.
- 27  11.   Sleire L, Forde HE, Netland IA, Leiss L, Skeie BS, and Enger PO. Drug  
28       repurposing in cancer. *Pharmacol Res.* 2017;124:74-91.
- 29  12.   van't Veer LJ, and Bernards R. Enabling personalized cancer medicine through  
30       analysis of gene-expression patterns. *Nature.* 2008;452(7187):564-70.
- 31  13.   Subramanian A, Narayan R, Corsello SM, Peck DD, Natoli TE, Lu X, et al. A  
32       Next Generation Connectivity Map: L1000 Platform and the First 1,000,000  
33       Profiles. *Cell.* 2017;171(6):1437-52 e17.
- 34  14.   van Noort V, Scholch S, Iskar M, Zeller G, Ostertag K, Schweitzer C, et al.  
35       Novel drug candidates for the treatment of metastatic colorectal cancer through  
36       global inverse gene-expression profiling. *Cancer Res.* 2014;74(20):5690-9.
- 37  15.   Chen B, Ma L, Paik H, Sirota M, Wei W, Chua MS, et al. Reversal of cancer  
38       gene expression correlates with drug efficacy and reveals therapeutic targets.  
39       *Nat Commun.* 2017;8:16022.
- 40  16.   Lee H, Kang S, and Kim W. Drug Repositioning for Cancer Therapy Based on  
41       Large-Scale Drug-Induced Transcriptional Signatures. *PLoS One.*  
42       2016;11(3):e0150460.
- 43  17.   Ten Hagen KG, Fritz TA, and Tabak LA. All in the family: the UDP-  
44       GalNAc:polypeptide N-acetylgalactosaminyltransferases. *Glycobiology.*  
45       2003;13(1):1R-16R.
- 46  18.   Wagner KW, Punnoose EA, Januario T, Lawrence DA, Pitti RM, Lancaster K, et

- 1 al. Death-receptor O-glycosylation controls tumor-cell sensitivity to the  
2 proapoptotic ligand Apo2L/TRAIL. *Nat Med.* 2007;13(9):1070-7.
- 3 19. Wu C, Shan Y, Liu X, Song W, Wang J, Zou M, et al. GalNAc-T14 may be  
4 involved in regulating the apoptotic action of IGFBP-3. *J Biosci.*  
5 2009;34(3):389-95.
- 6 20. Song KH, Park MS, Nandu TS, Gadad S, Kim SC, and Kim MY. GALNT14  
7 promotes lung-specific breast cancer metastasis by modulating self-renewal and  
8 interaction with the lung microenvironment. *Nat Commun.* 2016;7:13796.
- 9 21. Huanna T, Tao Z, Xiangfei W, Longfei A, Yuanyuan X, Jianhua W, et al.  
10 GALNT14 mediates tumor invasion and migration in breast cancer cell MCF-7.  
11 *Mol Carcinog.* 2015;54(10):1159-71.
- 12 22. Wang R, Yu C, Zhao D, Wu M, and Yang Z. The mucin-type glycosylating  
13 enzyme polypeptide N-acetylgalactosaminyltransferase 14 promotes the  
14 migration of ovarian cancer by modifying mucin 13. *Oncol Rep.*  
15 2013;30(2):667-76.
- 16 23. Kwon OS, Oh E, Park JR, Lee JS, Bae GY, Koo JH, et al. GalNAc-T14  
17 promotes metastasis through Wnt dependent HOXB9 expression in lung  
18 adenocarcinoma. *Oncotarget.* 2015;6(39):41916-28.
- 19 24. Shan J, Liu Y, Wang Y, Li Y, Yu X, and Wu C. GALNT14 Involves the  
20 Regulation of Multidrug Resistance in Breast Cancer Cells. *Transl Oncol.*  
21 2018;11(3):786-93.
- 22 25. De Mariano M, Gallesio R, Chierici M, Furlanello C, Conte M, Garaventa A, et  
23 al. Identification of GALNT14 as a novel neuroblastoma predisposition gene.  
24 *Oncotarget.* 2015;6(28):26335-46.
- 25 26. Soria JC, Mark Z, Zatloukal P, Szima B, Albert I, Juhasz E, et al. Randomized  
26 phase II study of dulanermin in combination with paclitaxel, carboplatin, and  
27 bevacizumab in advanced non-small-cell lung cancer. *J Clin Oncol.*  
28 2011;29(33):4442-51.
- 29 27. Tsherniak A, Vazquez F, Montgomery PG, Weir BA, Kryukov G, Cowley GS, et  
30 al. Defining a Cancer Dependency Map. *Cell.* 2017;170(3):564-76 e16.
- 31 28. Stern HM, Padilla M, Wagner K, Amler L, and Ashkenazi A. Development of  
32 immunohistochemistry assays to assess GALNT14 and FUT3/6 in clinical trials  
33 of dulanermin and drozitumab. *Clin Cancer Res.* 2010;16(5):1587-96.
- 34 29. Gross BJ, Swoboda JG, and Walker S. A strategy to discover inhibitors of O-  
35 linked glycosylation. *J Am Chem Soc.* 2008;130(2):440-1.
- 36 30. Hang HC, Yu C, Ten Hagen KG, Tian E, Winans KA, Tabak LA, et al. Small  
37 molecule inhibitors of mucin-type O-linked glycosylation from a uridine-based  
38 library. *Chem Biol.* 2004;11(3):337-45.
- 39 31. Gandolfi S, Laubach JP, Hideshima T, Chauhan D, Anderson KC, and  
40 Richardson PG. The proteasome and proteasome inhibitors in multiple myeloma.  
41 *Cancer Metastasis Rev.* 2017;36(4):561-84.
- 42 32. Maggiora G, Vogt M, Stumpfe D, and Bajorath J. Molecular similarity in  
43 medicinal chemistry. *J Med Chem.* 2014;57(8):3186-204.
- 44 33. Groll M, Berkers CR, Ploegh HL, and Ovaa H. Crystal structure of the boronic  
45 acid-based proteasome inhibitor bortezomib in complex with the yeast 20S  
46 proteasome. *Structure.* 2006;14(3):451-6.
- 47 34. Massague J. How cells read TGF-beta signals. *Nat Rev Mol Cell Biol.*

- 1           2000;1(3):169-78.
- 2   35.   Wakefield LM, and Roberts AB. TGF-beta signaling: positive and negative  
3           effects on tumorigenesis. *Curr Opin Genet Dev.* 2002;12(1):22-9.
- 4   36.   Padua D, and Massague J. Roles of TGFbeta in metastasis. *Cell Res.*  
5           2009;19(1):89-102.
- 6   37.   Levy L, and Hill CS. Smad4 dependency defines two classes of transforming  
7           growth factor {beta} (TGF- $\beta$ ) target genes and distinguishes TGF- $\beta$ -  
8           induced epithelial-mesenchymal transition from its antiproliferative and  
9           migratory responses. *Mol Cell Biol.* 2005;25(18):8108-25.
- 10 38.   Li AM, Tian AX, Zhang RX, Ge J, Sun X, and Cao XC. Protocadherin-7 induces  
11           bone metastasis of breast cancer. *Biochem Biophys Res Commun.*  
12           2013;436(3):486-90.
- 13 39.   Moon YW, Rao G, Kim JJ, Shim HS, Park KS, An SS, et al. LAMC2 enhances  
14           the metastatic potential of lung adenocarcinoma. *Cell Death Differ.*  
15           2015;22(8):1341-52.
- 16 40.   Zhou X, Updegraff BL, Guo Y, Peyton M, Girard L, Larsen JE, et al. Dissecting  
17           the Role of PCDH7, an Oncogenic Cell Surface Receptor, in  
18           Non-Small Cell Lung Cancer. *Journal of Thoracic Oncology.*  
19           2017;12(8):S1542.
- 20 41.   Huang D, Du C, Ji D, Xi J, and Gu J. Overexpression of LAMC2 predicts poor  
21           prognosis in colorectal cancer patients and promotes cancer cell proliferation,  
22           migration, and invasion. *Tumour Biol.* 2017;39(6):1010428317705849.
- 23 42.   Gupta GP, and Massague J. Cancer metastasis: building a framework. *Cell.*  
24           2006;127(4):679-95.
- 25 43.   Jahchan NS, Dudley JT, Mazur PK, Flores N, Yang D, Palmerton A, et al. A drug  
26           repositioning approach identifies tricyclic antidepressants as inhibitors of small  
27           cell lung cancer and other neuroendocrine tumors. *Cancer Discov.*  
28           2013;3(12):1364-77.
- 29 44.   Zeniya M, Mori T, Yui N, Nomura N, Mandai S, Isobe K, et al. The proteasome  
30           inhibitor bortezomib attenuates renal fibrosis in mice via the suppression of  
31           TGF- $\beta$ 1. *Sci Rep.* 2017;7(1):13086.
- 32 45.   Chang TP, Poltoratsky V, and Vancurova I. Bortezomib inhibits expression of  
33           TGF- $\beta$ 1, IL-10, and CXCR4, resulting in decreased survival and migration of  
34           cutaneous T cell lymphoma cells. *J Immunol.* 2015;194(6):2942-53.
- 35 46.   Padua D, Zhang XH, Wang Q, Nadal C, Gerald WL, Gomis RR, et al. TGFbeta  
36           primes breast tumors for lung metastasis seeding through angiopoietin-like 4.  
37           *Cell.* 2008;133(1):66-77.
- 38 47.   Wagle MC, Kirouac D, Klijn C, Liu B, Mahajan S, Junttila M, et al. A  
39           transcriptional MAPK Pathway Activity Score (MPAS) is a clinically relevant  
40           biomarker in multiple cancer types. *Npj Precis Oncol.* 2018;2.
- 41 48.   Argyriou AA, Iconomou G, and Kalofonos HP. Bortezomib-induced peripheral  
42           neuropathy in multiple myeloma: a comprehensive review of the literature.  
43           *Blood.* 2008;112(5):1593-9.
- 44 49.   Oprea TI, and Overington JP. Computational and Practical Aspects of Drug  
45           Repositioning. *Assay Drug Dev Technol.* 2015;13(6):299-306.
- 46 50.   Iorio F, Rittman T, Ge H, Menden M, and Saez-Rodriguez J. Transcriptional data:  
47           a new gateway to drug repositioning? *Drug Discov Today.* 2013;18(7-8):350-7.

- 1 51. Dobin A, Davis CA, Schlesinger F, Drenkow J, Zaleski C, Jha S, et al. STAR:  
2 ultrafast universal RNA-seq aligner. *Bioinformatics*. 2013;29(1):15-21.
- 3 52. Love MI, Huber W, and Anders S. Moderated estimation of fold change and  
4 dispersion for RNA-seq data with DESeq2. *Genome Biol*. 2014;15(12):550.
- 5



1 **Figure Legends**

2 **Figure 1 *GALNT14* as a putative molecular target for lung cancer metastasis**

3 **A.** Identification of therapeutic targets for both cancer progression and recurrence based  
4 on transcriptomic analysis of lung cancer patients. **B.** Selection of therapeutic target  
5 candidates that are differential expressed between tumor and normal tissue as well as  
6 significantly associated to RFS in the 516 patient dataset from TCGA LUAD. Red  
7 circles indicate metastasis-related genes annotated by MSigDB. **C.** Enrichment analysis  
8 of metastatic and tumor signatures between high- and low-expressed patient groups for  
9 each of the seven candidate genes. **D.** The normalized enrichment score (NES) was  
10 calculated by Gene Set Enrichment Analysis (GSEA) for the metastasis (left) and  
11 tumorigenesis signature (right) after all the genes were ranked by their expression fold  
12 change. **E-F.** Control H460 (shCont) and *GALNT14* knockdown (shGal) cells were  
13 injected into lateral tail vein (E) or flanks (F) of nude mice. The representative H&E  
14 staining images of tumor-bearing lung (E) and tumors (F) were presented. **G.**  
15 Comparison of *GALNT14* dependencies among metastatic and primary cell lines from  
16 lung and other types of cancer from the *Project Achilles* dataset. Only metastatic lung  
17 cells show a significant dependency on *GALNT14*. **H.** Comparison between the high-  
18 and low- expression group for *GALNT14* in terms of locoregional recurrence-free  
19 survival (LRFS), and distant metastasis-free survival (DMFS) in LUAD patients.

20 **Figure 2 Computational repositioning of BTZ to reverse the *GALNT14* expression**  
21 **signature**

22 **A.** CMap analyses to prioritize anti-metastatic candidate drugs using the two  
23 independent *GALNT14* signatures. Candidate drugs were prioritized according to the  
24 similarities between drug-induced down-DEGs and the two *GALNT14* signatures. **B.**

1 DR score of top candidate drugs selected by the *GALNT14* signatures from TCGA (x-  
2 axis) and H460 (y-axis). The two drugs marked in red (dexamethasone and bortezomib)  
3 got high scores in both predictions. **C.** Representative microscopic images of cell  
4 migration after treatment of indicated dose of (nM) of BTZ and DEX (left), Relative  
5 recovery ratio of indicated group was graphically presented. (right, n.s: not significant)  
6 **D.** Proteasome activity in H460 cells after indicated dose of BTZ was graphically  
7 presented. **E.** Representative microscopic images of cell migration at 43 hours after  
8 treatment of indicated dose of (nM) of BTZ (left), Relative recovery ratio of indicated  
9 dose was graphically presented (right) **F.** Representative image of invaded cell through  
10 two-chamber model after DMSO or 20 nM of BTZ treatment (left), Relative invasion  
11 area was graphically presented (right). **G.** Flow cytometry for Annexin V and 7-AAD at  
12 24 hours after indicated dose of BTZ (top), Graphical presentation of live (white box)  
13 and dead (black box) was shown (bottom). **H.** Flow cytometry of cell cycle profile at 24  
14 hours after indicated dose of BTZ treatment (left), Graphical presentation of each cell  
15 cycle (G1, S and G2/M) were shown (right).

16 **Figure 3 The effect of BTZ is independent of proteasome inhibition**

17 **A.** Chemical structure of proteasome inhibitors (bortezomib, carfilzomib, and ixazomib)  
18 and their Tanimoto similarity heatmap. Red circle indicates the boronic acid structure. **B.**  
19 Immunoblotting for  $\beta$ -catenin, Cyclin D1 and p27 after treatment of BTZ (20 nM) and  
20 CFZ (20 nM),  $\alpha$ -tubulin for equal protein loading control **C.** Representative  
21 microscopic images of cell migration at 43 hours after 20 nM of BTZ and CFZ  
22 treatment (left), Relative recovery ratio was graphically presented (right, n.s: not  
23 significant). **D.** Representative image of invaded cell through two-chamber model  
24 after DMSO or 20 nM of BTZ or CFZ treatment (left), Relative invasion area was

1 graphically presented (right, n.s.: not significant). **E.** Sample clustering using t-SNE  
2 based on the expression of whole genes, metastasis-related genes and proteasome-  
3 related genes. Each sample was colored according to its perturbation type. **F.** Venn  
4 diagram of differentially down-regulated genes by BTZ, CFZ and sh*GAL* perturbation  
5 in the gene space of whole genes.

6 **Figure 4 Attenuation of the TGF $\beta$  gene response by BTZ treatment or *GALNT14***  
7 **knockdown**

8 **A.** Enriched pathways in the 101 genes common to the down-regulated signatures by  
9 BTZ treatment and *GALNT14* knockdown (hypergeometric test, P value < 0.01 and  
10 FDR < 0.1), and the distribution of RFS HR for the pathway genes in TCGA LUAD  
11 cohort (red circle: the median HR of the pathway genes, horizontal bar: the range of HR  
12 in each pathway). **B.** mRNA expression of TGF-beta signaling genes among the 101  
13 common signature genes by *GALNT14* depletion and BTZ treatment. **C.** Relative  
14 luciferase reporter activity (SBE, ARE and BRE) of shRNA control (shCont: white box)  
15 and *GALNT14* knockdown (shGal: black box) H460 cells was graphically presented. **D.**  
16 BRE luciferase activity at 24 hours after 20 nM of BTZ or CFZ treatment (n.s.: not  
17 significant) **E.** Immunoblotting analysis for phosphorylated SMAD2 (pSMAD2) and  
18 phosphorylated ERK2 (pERK2) pretreated with DMSO or 20 nM of BTZ at indicated  
19 time after TGF $\beta$  (10 ng/ml) treatment,  $\beta$ -actin used as an equal protein loading control **F.**  
20 Fluorescent microscopic images for SMAD4 (green) after 20nM of BTZ treatment,  
21 DAPI (blue) for nuclear counterstaining **G-H** Representative microscopic images of cell  
22 migration (G) and invaded cells of two-chamber invasion assay (H) at 48 hours after  
23 introduction of control siRNA (siN.C) or siRNA for SMAD4 (siSMAD4) (left),  
24 Relative recovery ratio (G) or invaded area (H) was graphically presented (right). **I-L.**

1 Analysis of TCGA LUAD cohort, **I.** The relationships between correlation score with  
2 *GALNT14* expression (z-transform of Spearman correlation, x-axis) and RFS HR (y-  
3 axis) of each gene in TGF $\beta$  target genes. The dependency of TGF $\beta$  target genes on  
4 Smad4 was labeled with two different colors (yellow: Smad4-dependent, blue: Smad4-  
5 independent). **J.** KM plot of RFS stratified by the combination of *GALNT14* expression  
6 (low and high) and TGF $\beta$  target activity (low and high). TGF $\beta$  target activity was  
7 measured using SMAD4 dependent genes (left) and independent genes (right)  
8 individually. Significant differences between the patient groups were marked with the  
9 asterisk (\*). **K.** KM plot of RFS stratified by the *GALNT14*-TGF $\beta$  signature. *P* values  
10 and HR were calculated with the log-rank test and Cox regression, respectively. **L.**  
11 Differences in *GALNT14* expression by *GALNT14*-TGF $\beta$  signature in TCGA LUAD  
12 cohort. *P* values were calculated with Student's t-test.

13 **Figure 5 *In vivo* validation of anti-metastatic effect of BTZ**

14 **A.** Schematic overview of *in vivo* experimental procedure **B-D.** Lateral tail vein  
15 injection of vehicle (saline, n=9) or BTZ (0.1 mg/kg, n=7) or CFZ (0.5 mg/kg, n=7)  
16 followed by H460 cells (B) Proteasome activity in whole blood collected 1 hour after  
17 BTZ or CFZ was graphically presented. (P.C: positive control, described in material  
18 method) (C) Body weight of each mouse monitored at indicated days, was graphically  
19 presented (D) Representative images of whole lung of each group was presented (top).  
20 White arrowheads indicate tumor nodule. Number of mice bearing tumor nodule was  
21 shown in the table (bottom). **E-F** Lateral tail vein injection of vehicle (saline, n=7) or  
22 BTZ (0.1 mg/kg, n=5) followed by H460 cells (E) Representative microscopic images  
23 of lung tumor bearing lesion (left) and graphical presentation of the number of  
24 metastatic tumor nodule (right) (F) Proteasome activity in whole blood collected 1 hour

- 1 after BTZ was graphically presented. (P.C: positive control, described in material
- 2 method)
- 3

1

2

# Figure 1

bioRxiv preprint doi: <https://doi.org/10.1101/394163>; this version posted January 22, 2019. The copyright holder for this preprint (which was not certified by peer review) is the author/funder. All rights reserved. No reuse allowed without permission.

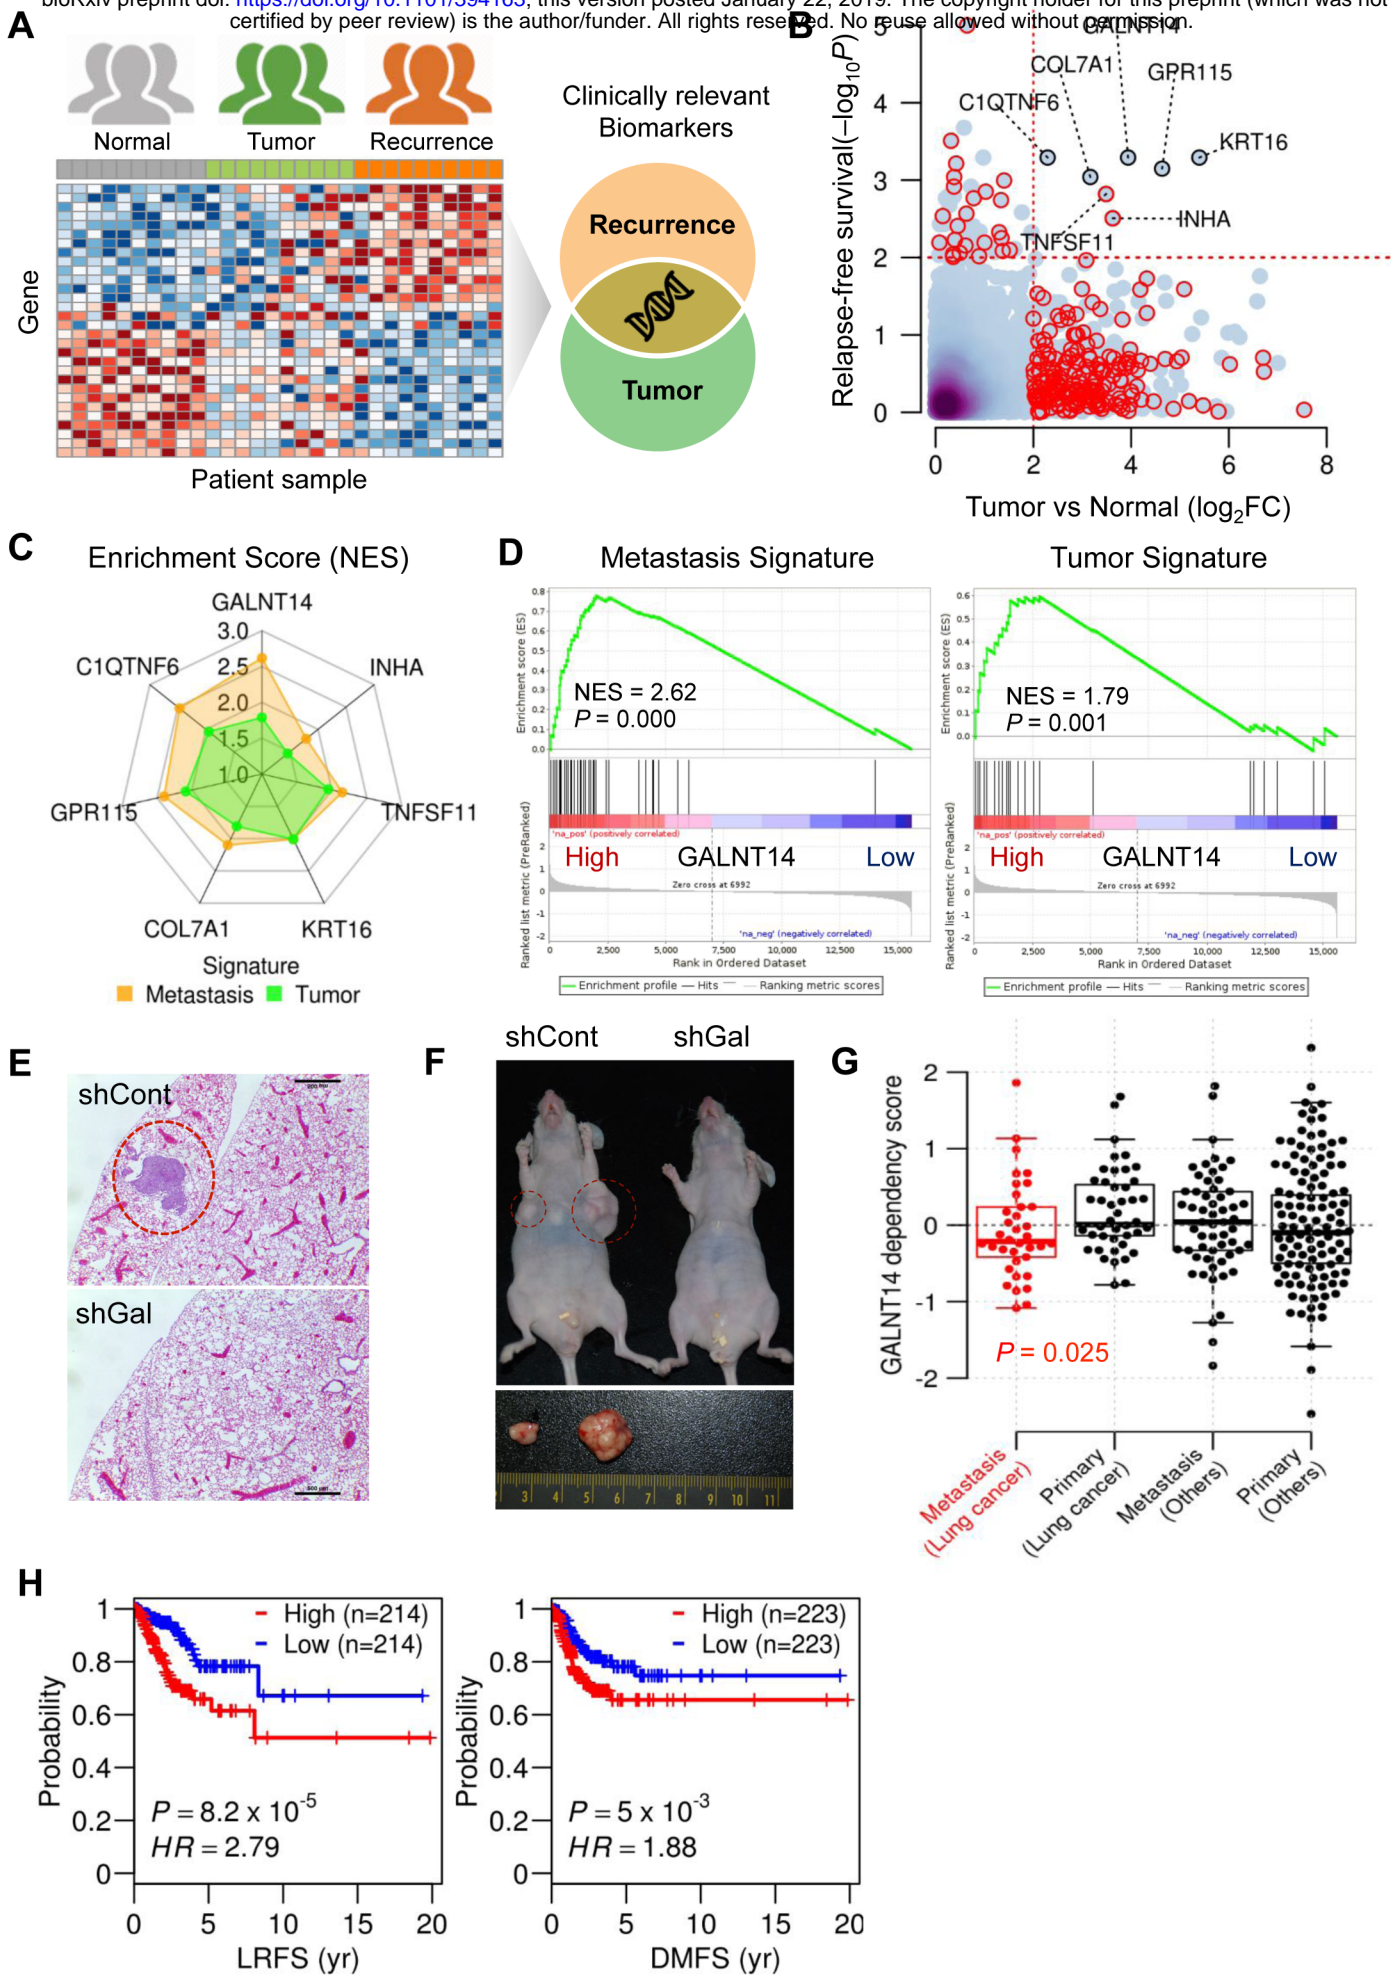

## Figure. 2

bioRxiv preprint doi: <https://doi.org/10.1101/394163>; this version posted January 22, 2019. The copyright holder for this preprint (which was not certified by peer review) is the author/funder. All rights reserved. No reuse allowed without permission.

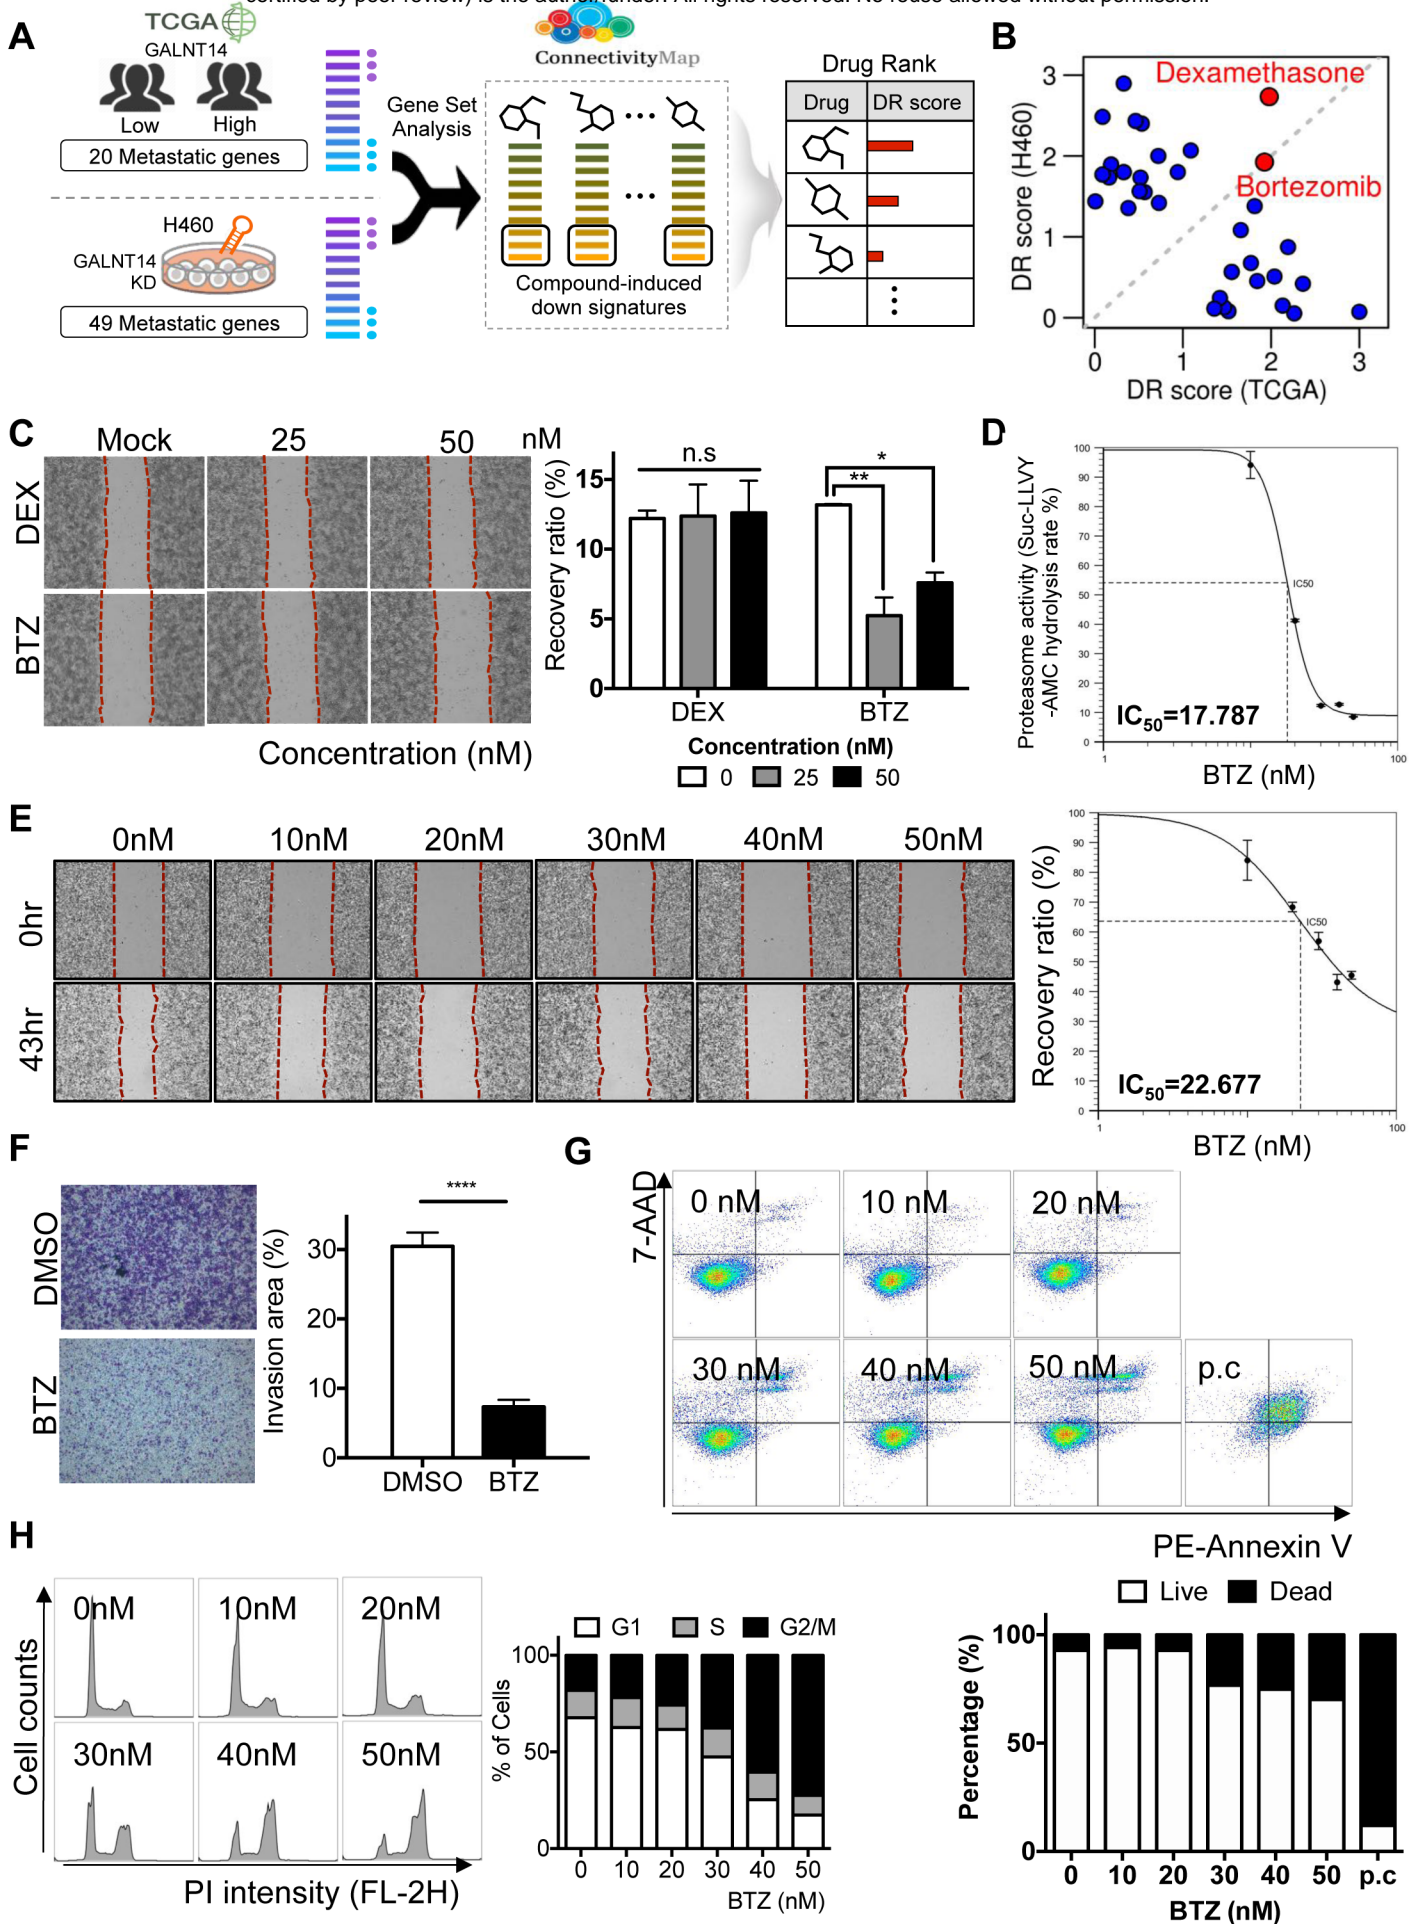



### Figure. 3

**A** bioRxiv preprint doi: <https://doi.org/10.1101/394163>; this version posted January 22, 2019. The copyright holder for this preprint (which was not certified by peer review) is the author/funder. All rights reserved. No reuse allowed without permission.

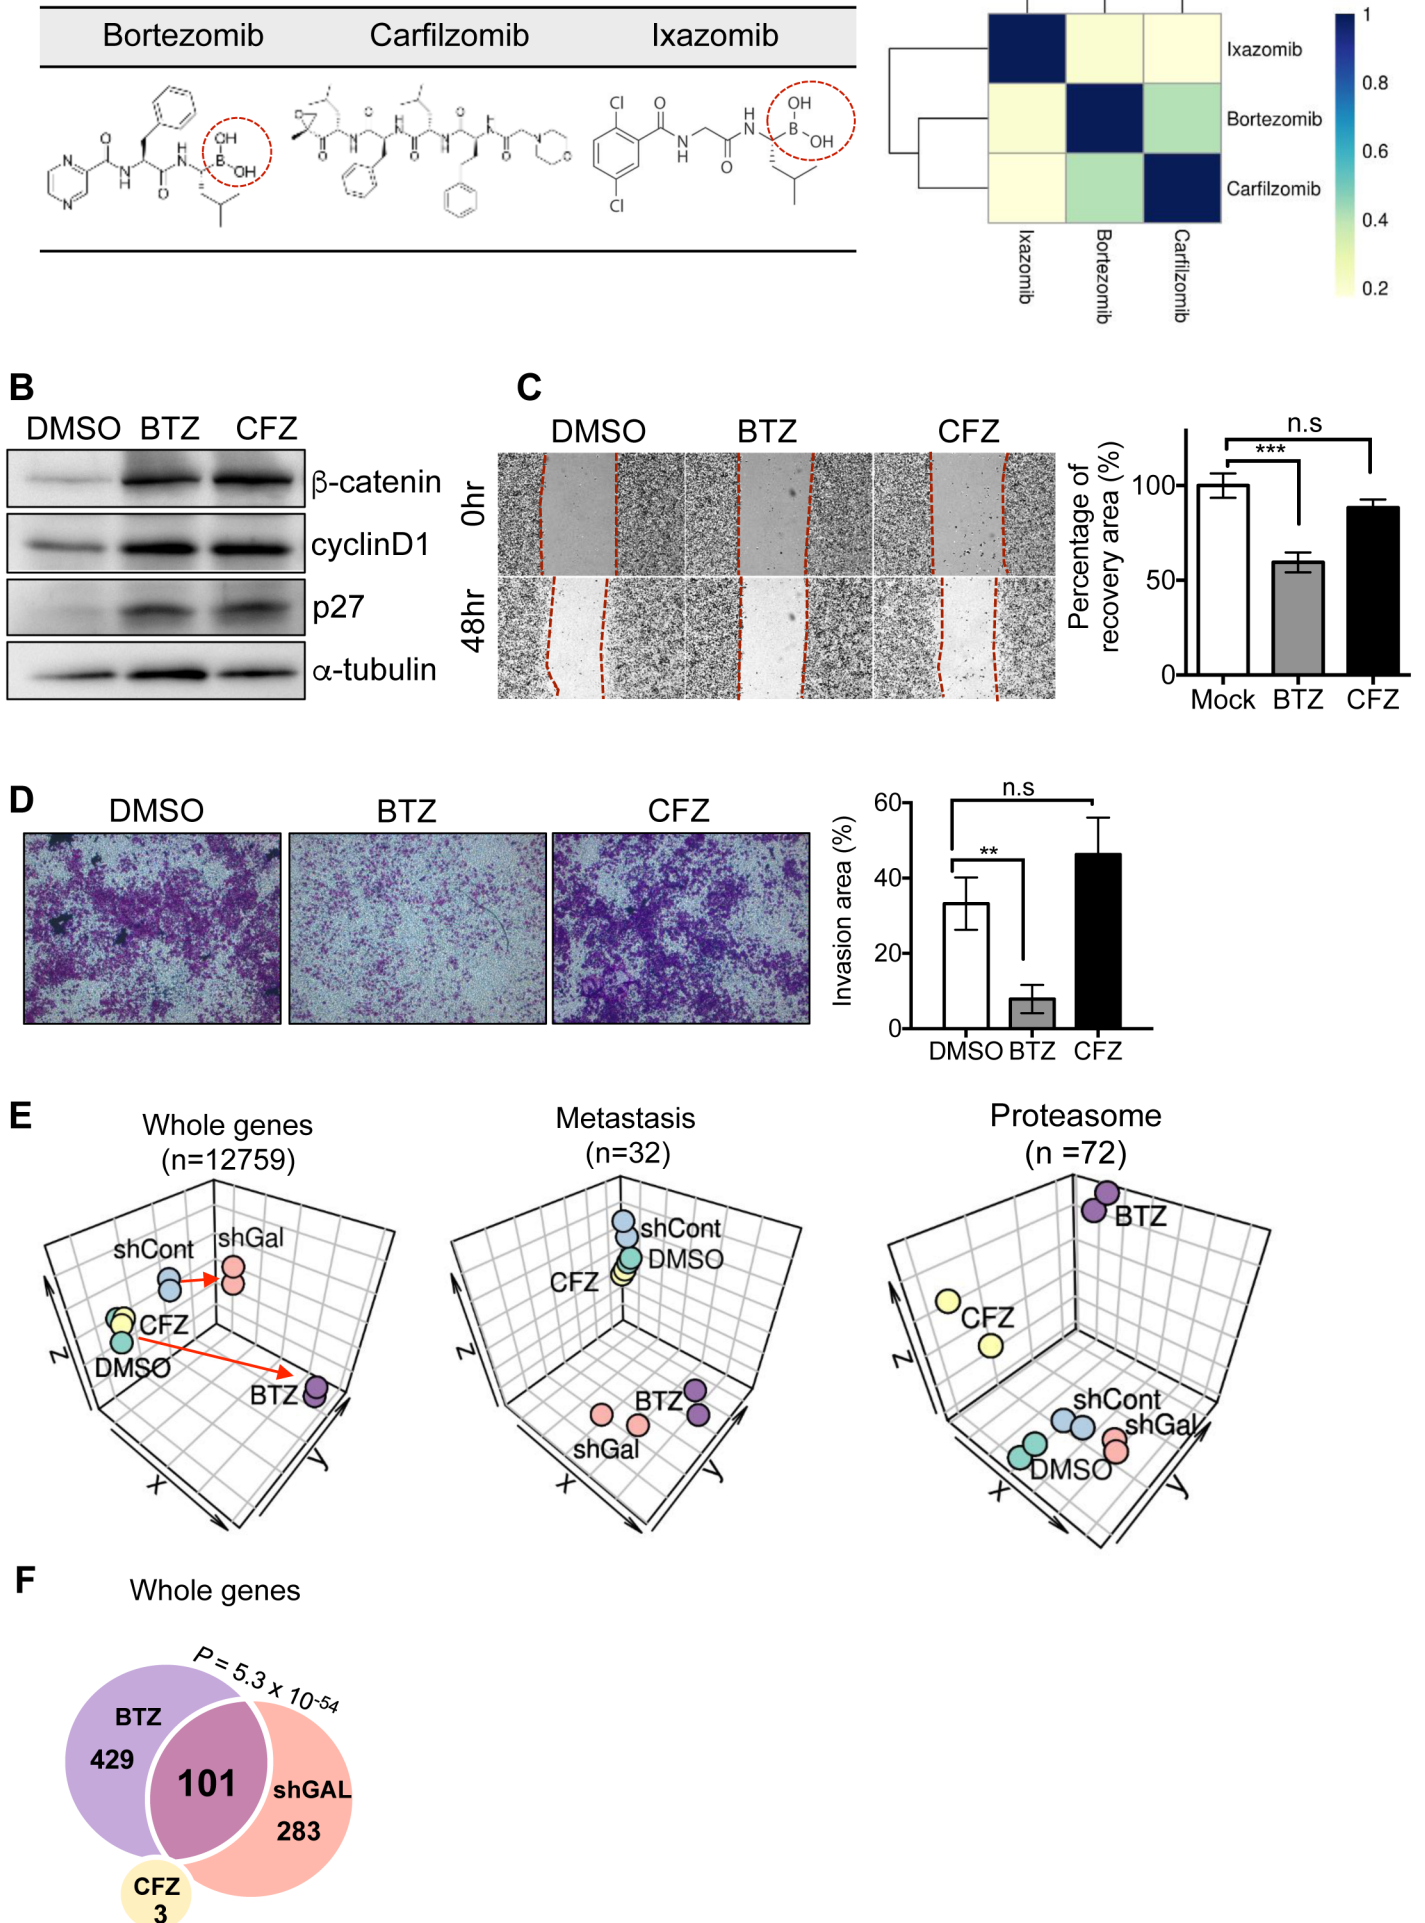

**Figure 4**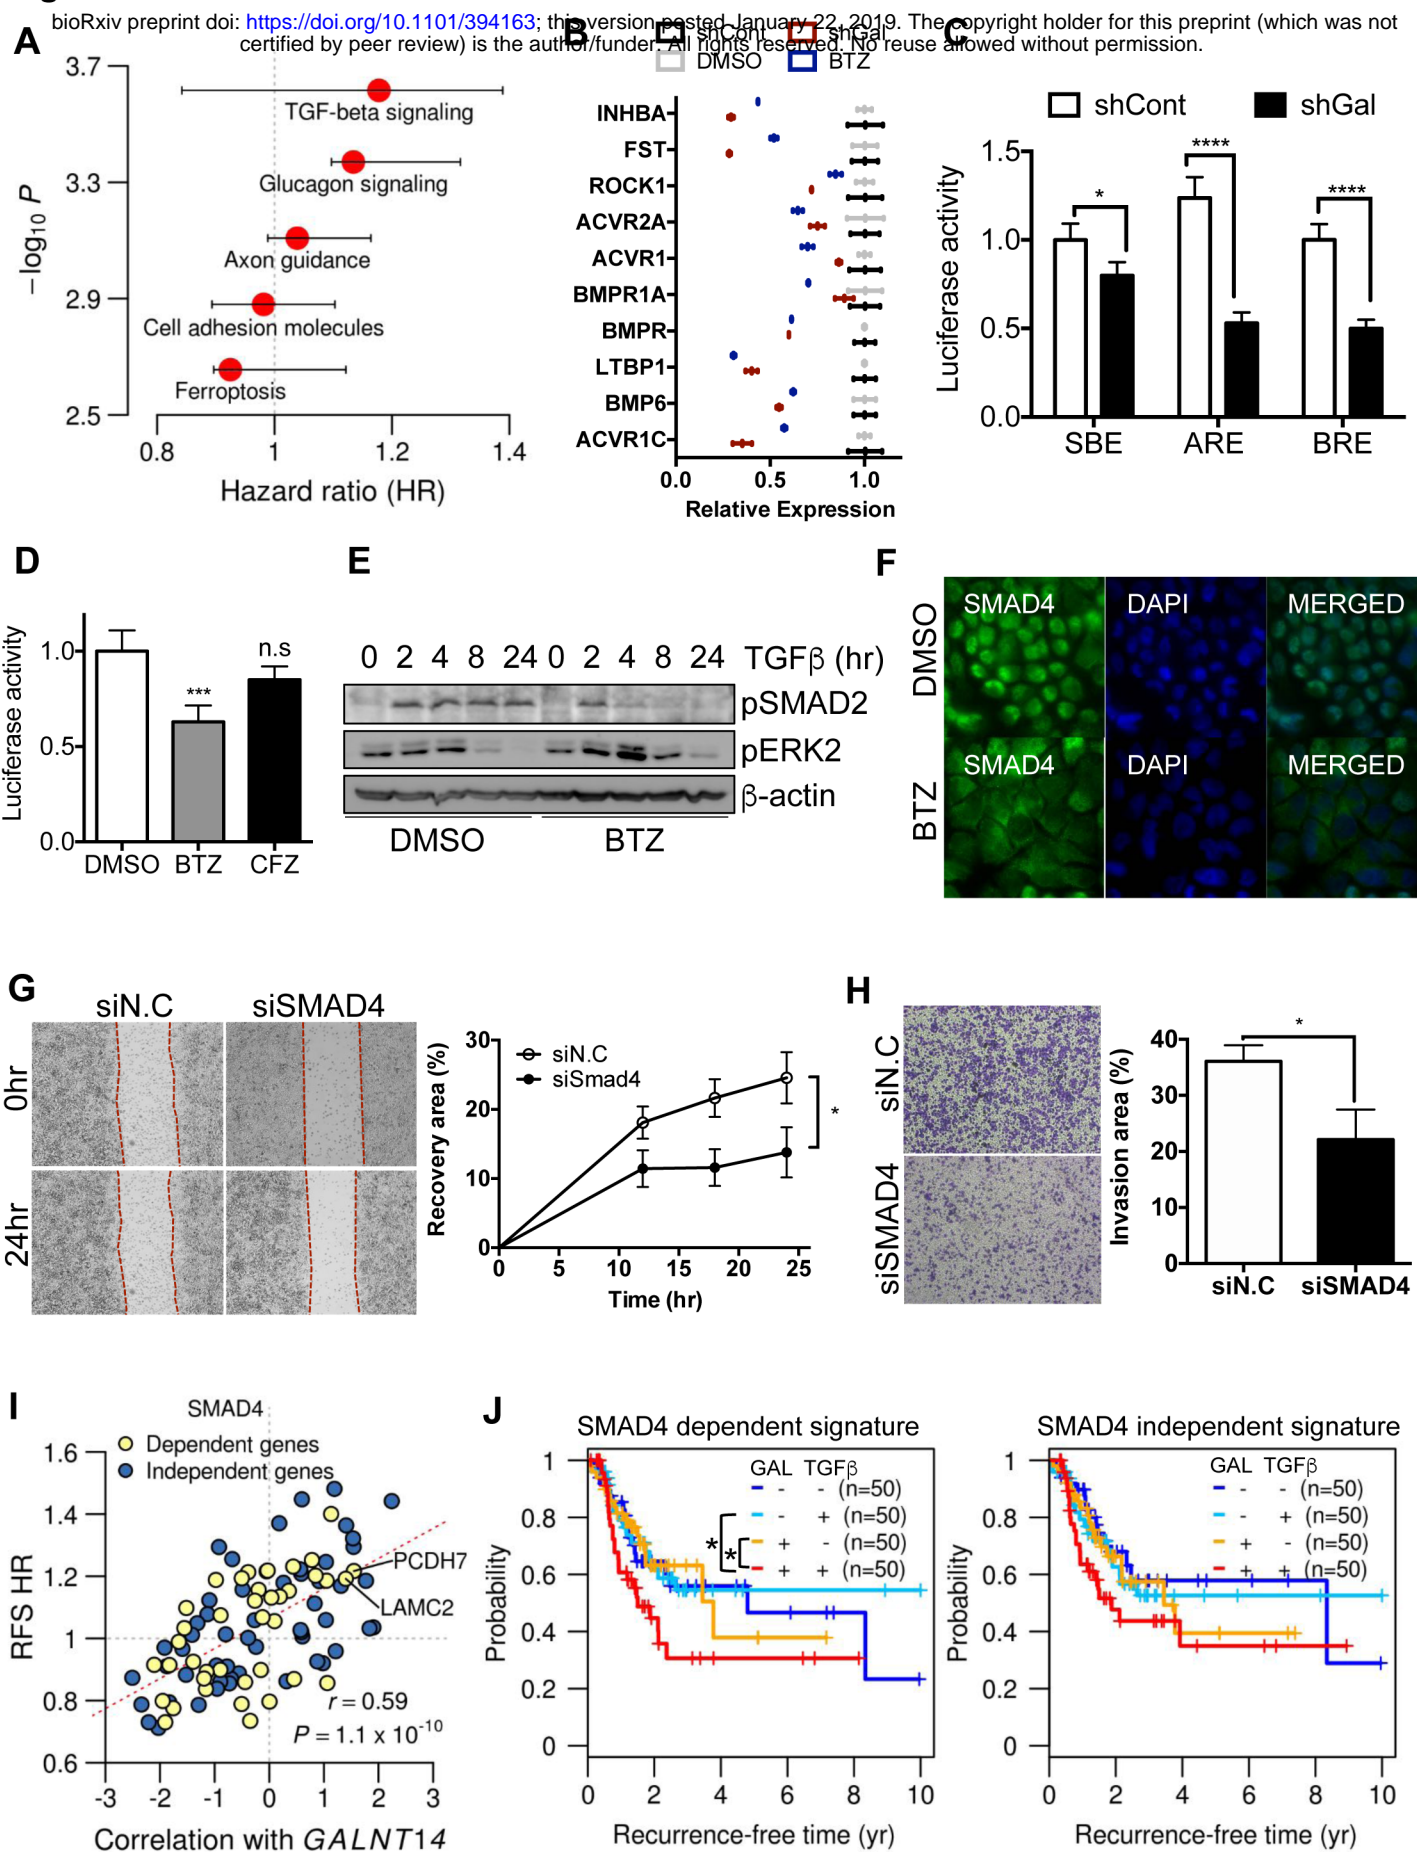

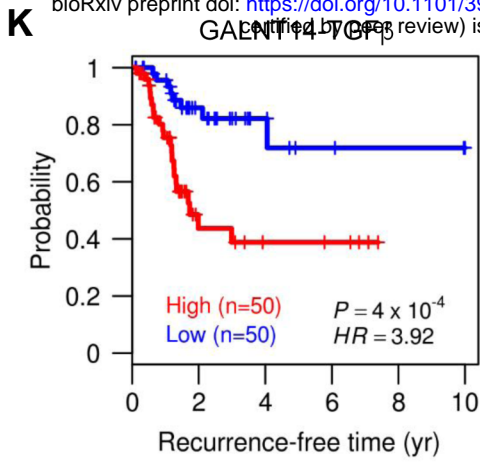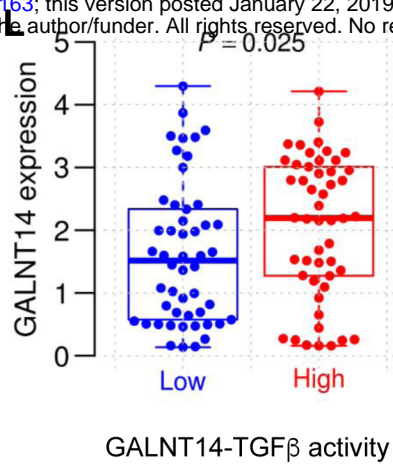

## Figure 5

**A** bioRxiv preprint doi: <https://doi.org/10.1101/394163>; this version posted January 22, 2019. The copyright holder for this preprint (which was not certified by peer review) is the author/funder. All rights reserved. No reuse allowed without permission.

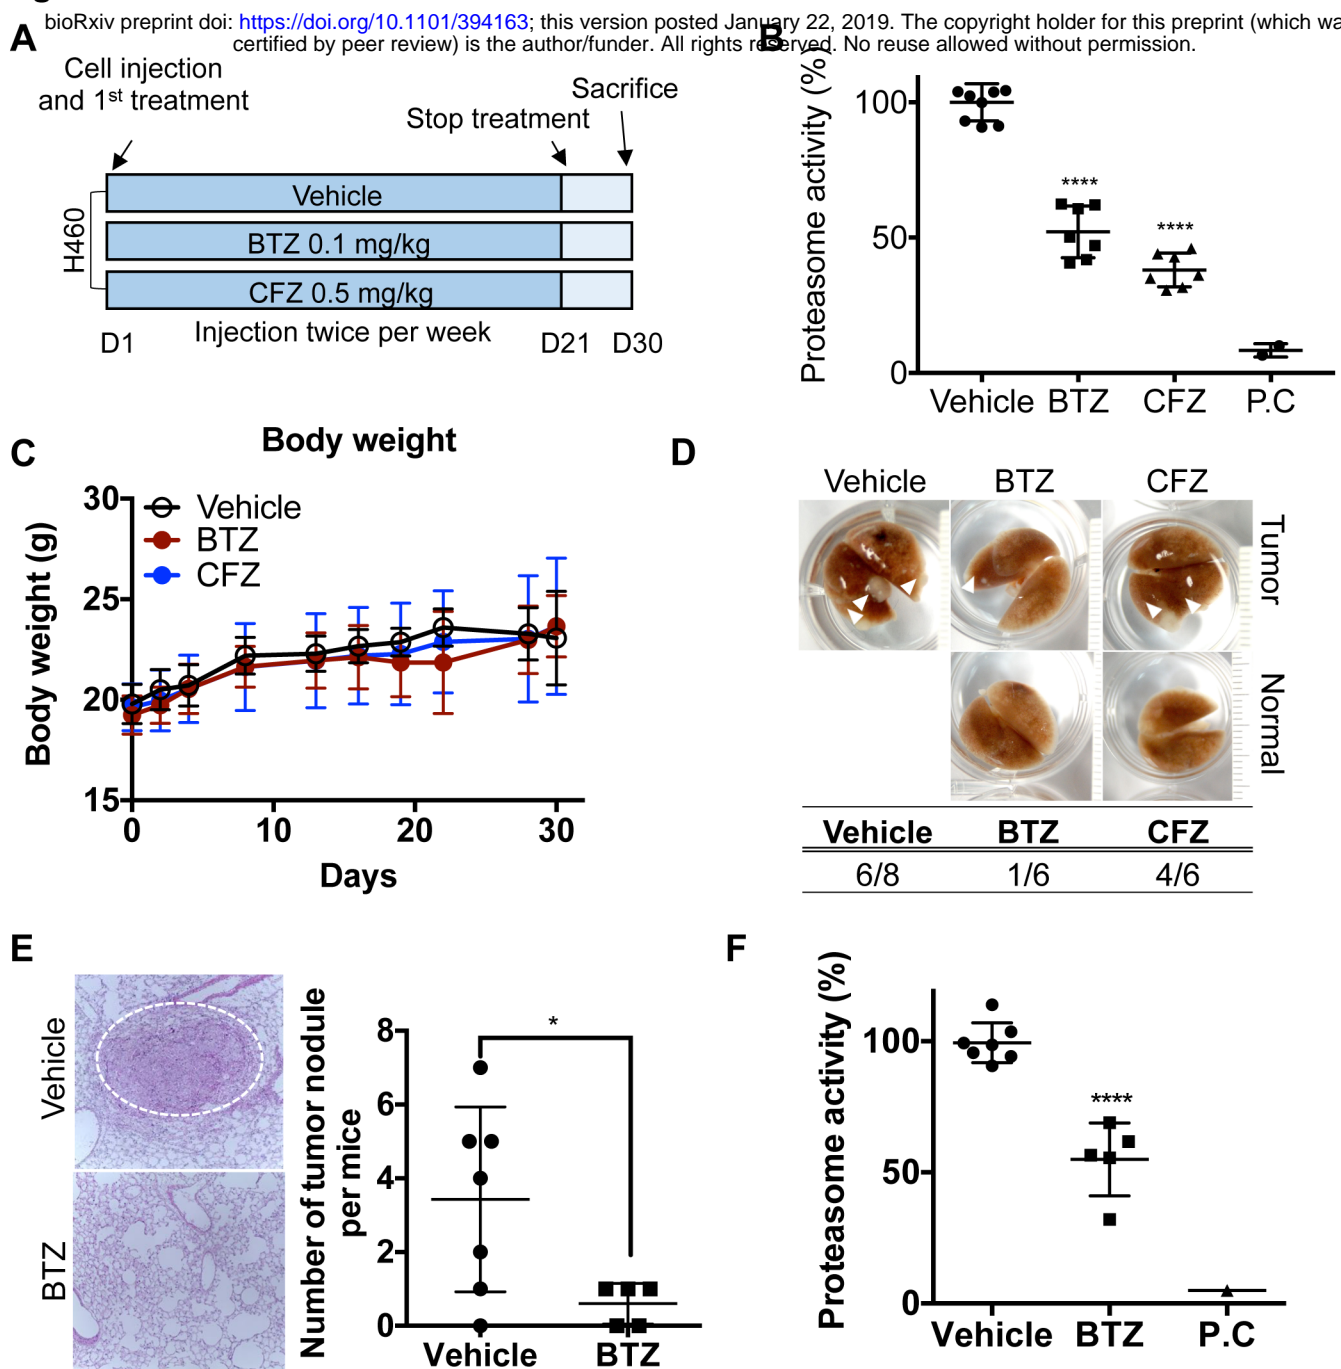

Source: https://www.biorxiv.org/content/10.1101/394163v2.full.pdf
